# Supplementary material
Source: PubMed Central journal article supplement (PMC6734938)
Supplement: NIHMS1530299-supplement-1.pdf [file NIHMS1530299-supplement-1.pdf]

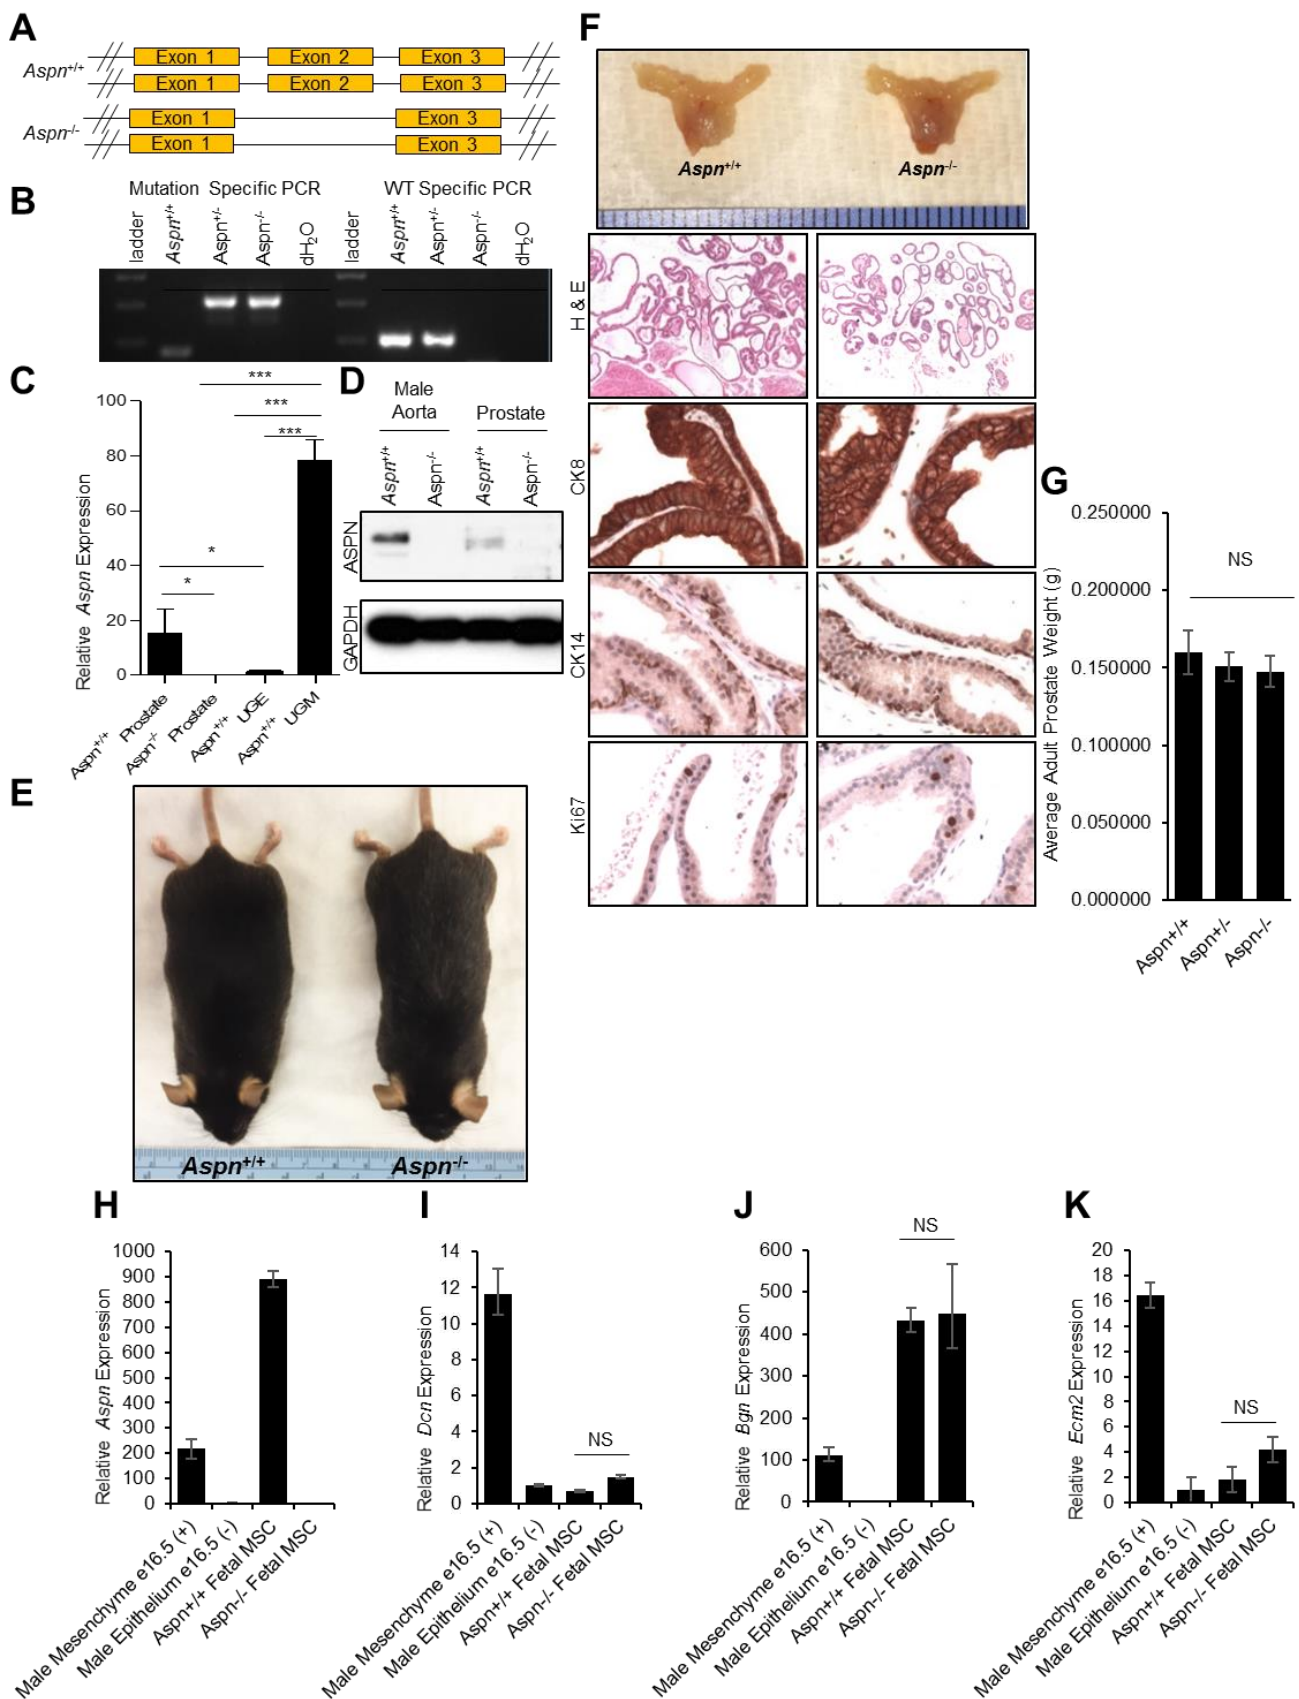

**Supplementary Figure S1.** Comparison of *Aspnl*<sup>+/+</sup> and *Aspnl*<sup>-/-</sup> mice. A, Targeting schematic for the generation of *Aspnl*<sup>-/-</sup> mice (B6J-*Aspnl*<sup>tm1Lex/Mmucd</sup>). B, Wild-type (WT) and mutation specific PCR for genotyping *Aspnl*<sup>-/-</sup> mice. C, *Aspnl* expression as determined by qRT-PCR in *Aspnl*<sup>+/+</sup> and *Aspnl*<sup>-/-</sup> prostates compared to male *Aspnl*<sup>+/+</sup> UGE (E) and UGM (M) at e16.5. Statistical analyses performed using one way ANOVA with Tukey multiple comparison (mean ± SEM; \**P*≤0.05, \*\*\**P*≤0.001; n=3). D, ASPN expression as determined by immunoblotting of *Aspnl*<sup>+/+</sup> and *Aspnl*<sup>-/-</sup> prostates and aorta. J, *Aspnl*<sup>+/+</sup> and *Aspnl*<sup>-/-</sup> mice at 6 months of age backcrossed at least 9 generations to C57BL/6J. F, *Aspnl*<sup>+/+</sup> and *Aspnl*<sup>-/-</sup> prostates examined by H&E and IHC for CK8, CK14, and Ki67. G, Comparison of *Aspnl*<sup>+/+</sup> and *Aspnl*<sup>-/-</sup> prostate weight. H-K, Relative *Aspnl*, *Dcn*, *Bgn*, and *Ecm2* expression as determined by qRT-PCR in UGM, UGS, *Aspnl*<sup>+/+</sup> MSCs, and *Aspnl*<sup>-/-</sup> MSCs. Statistical analyses performed using one-way ANOVA with Tukey multiple comparison (mean ± SEM; NS = Not Significant).

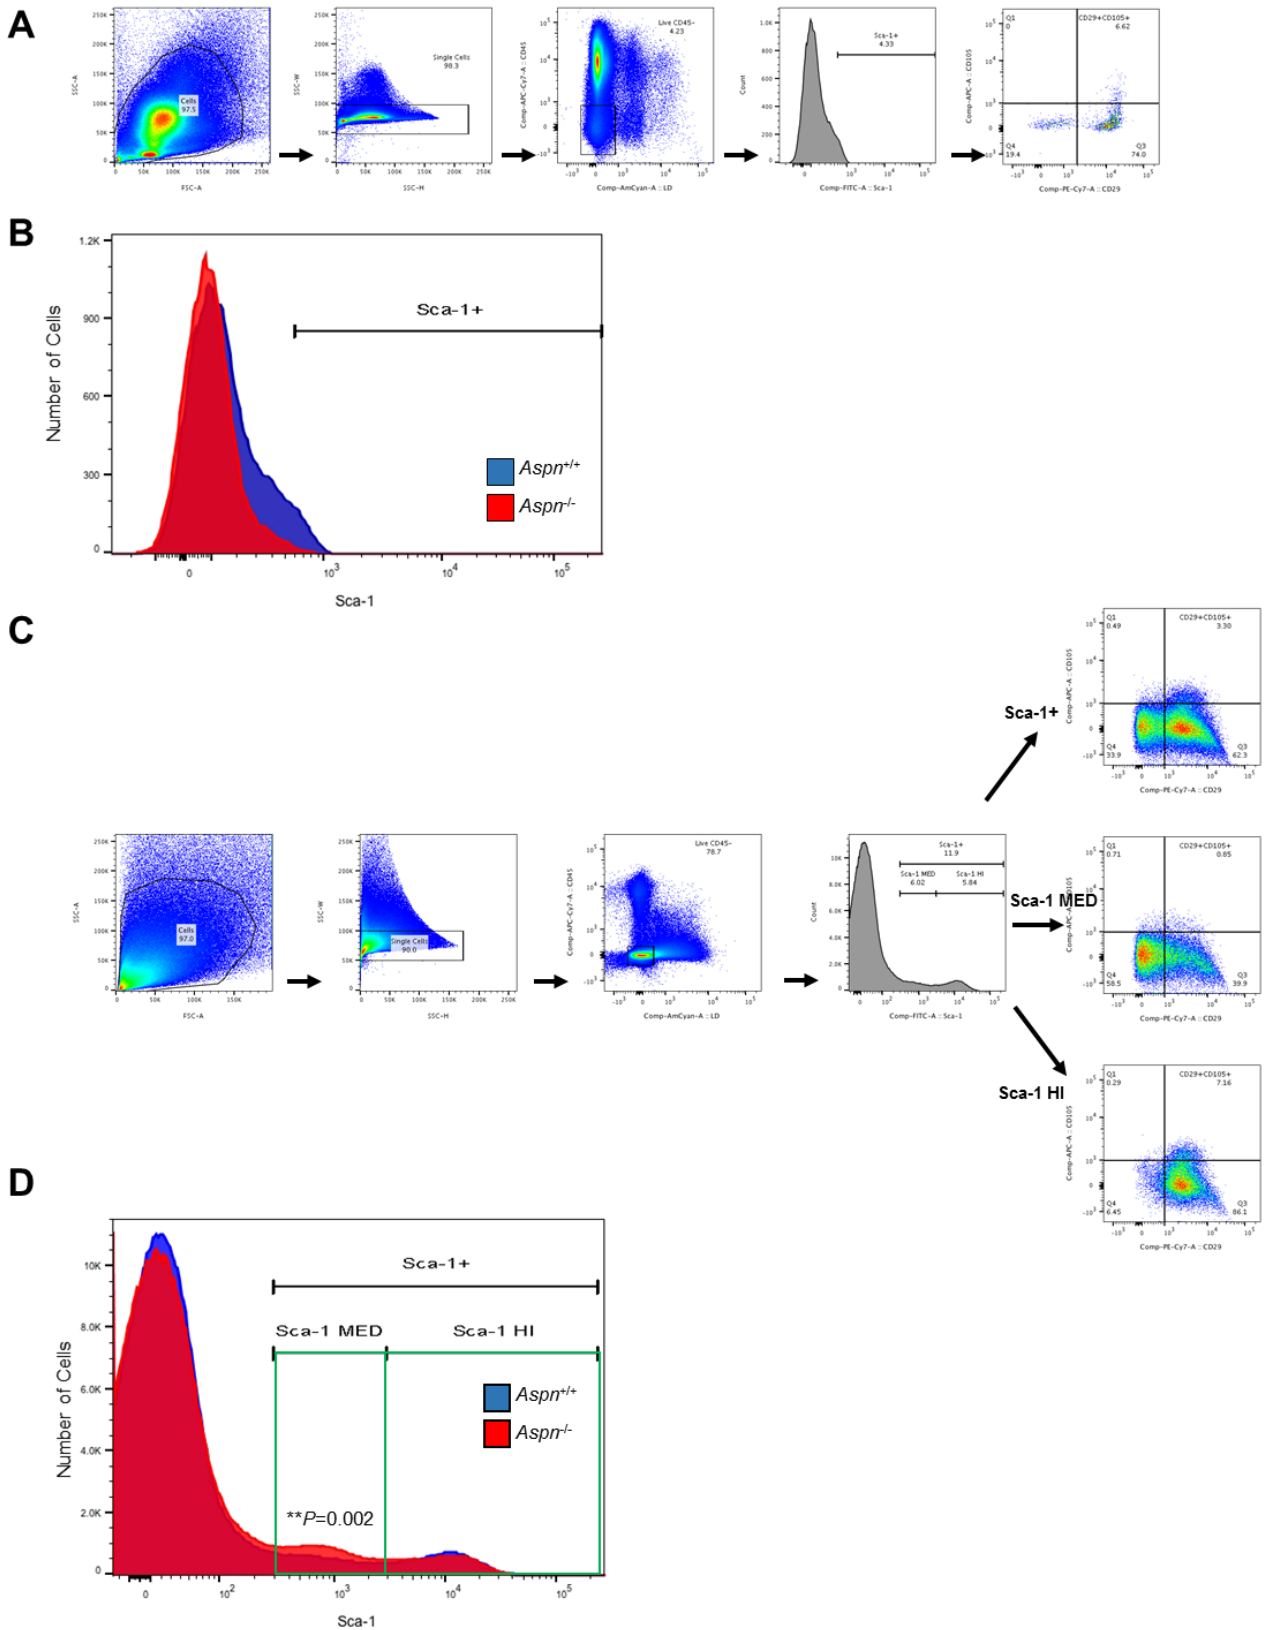

**Supplementary Figure S2.** Representative gating of murine adult bone marrow and prostate MSCs by flow cytometry. A, B, Gating for CD45<sup>-</sup>, CD29<sup>+</sup>, CD105<sup>+</sup>, and Sca-1<sup>+</sup> MSCs in the bone marrow. C, D, Gating for CD45<sup>-</sup>, CD29<sup>+</sup>, CD105<sup>+</sup>, and Sca-1<sup>+</sup> MSCs in the prostate (including Sca1<sup>med</sup> and Sca1<sup>hi</sup>).

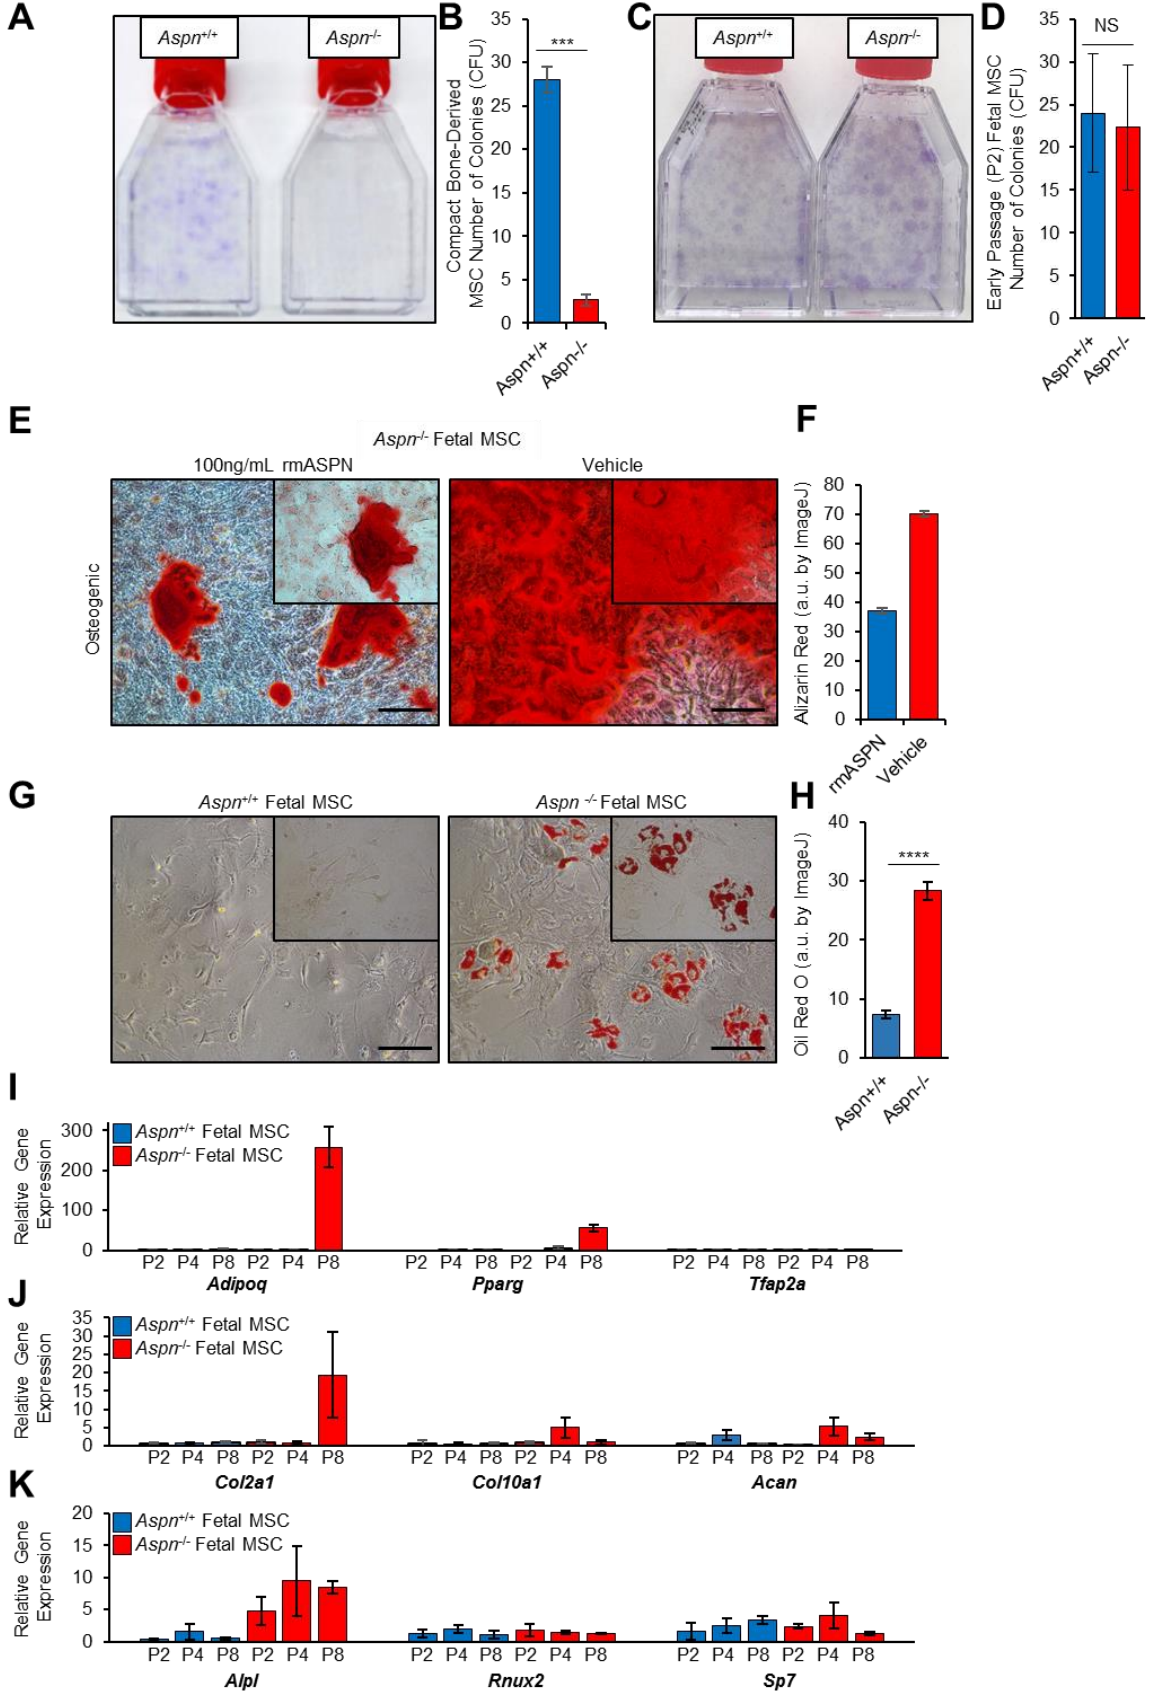

**Supplementary Figure S3.** ASPN restricts MSC differentiation. A, *Asprn<sup>+/+</sup>* and *Asprn<sup>-/-</sup>* adult compact bone-derived MSCs were isolated and then plated at equal densities for CFU assays. Displayed are the average number of colonies formed per  $5 \times 10^4$  cells plated. Statistical analyses performed using Student's t-test (mean  $\pm$  SEM; \*\*\* $P \leq 0.001$ ;  $n \geq 2$ ). C, D, Early passage (P2) *Asprn<sup>+/+</sup>* and *Asprn<sup>-/-</sup>* fetal MSCs were plated at equal densities for CFU assays. Displayed are the average number of colonies formed per  $1 \times 10^4$  cells plated. Statistical analyses performed using Student's t-test (mean  $\pm$  SEM; NS = not significant;  $n \geq 2$ ). E, F, *Asprn<sup>-/-</sup>* fetal MSCs were cultured in osteogenic-inducing media plus vehicle or 100 ng/mL of recombinant mouse ASPN. G-K, ASPN regulates MSC differentiation. G, H, *Asprn<sup>+/+</sup>* and *Asprn<sup>-/-</sup>* fetal MSCs were cultured in normal media for 8 passages (P8) and then stained for Oil Red O. Staining was quantified using ImageJ ( $n=3$ ). I-K, Expression of (I) adipogenic, (J) chondrogenic, and (K) osteogenic differentiation-induced genes in *Asprn<sup>+/+</sup>* and *Asprn<sup>-/-</sup>* fetal MSCs at P2, P4, and P8 as determined by qRT-PCR ( $n \geq 3$ ).

**A**

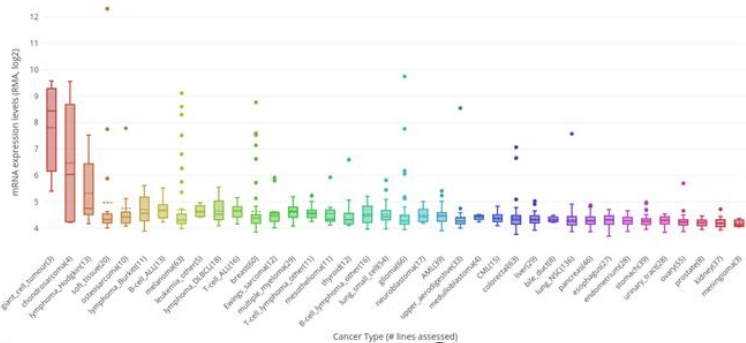

**B**

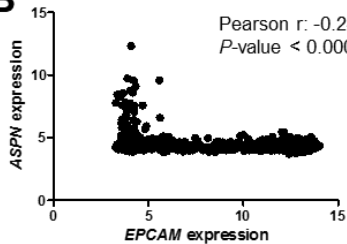

**C**

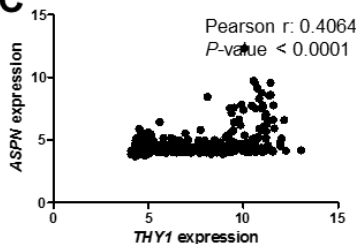

**D**

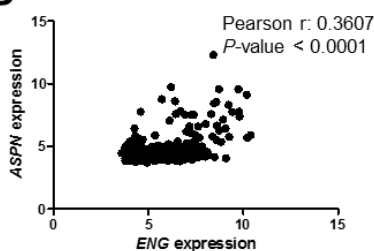

**E**

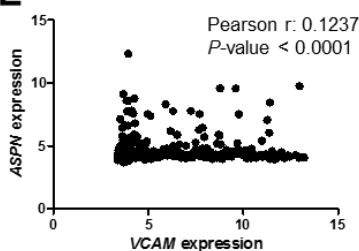

**F**

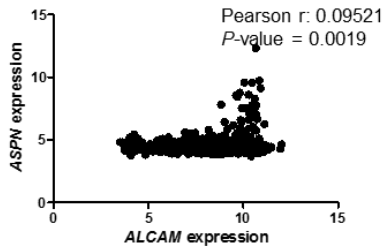

**G**

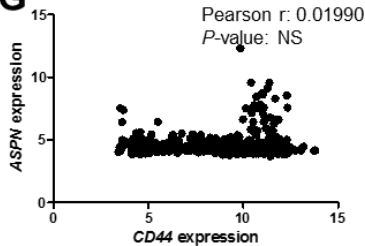

**H**

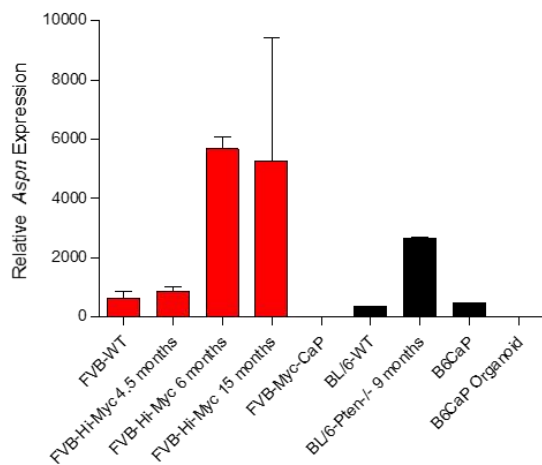

**I**

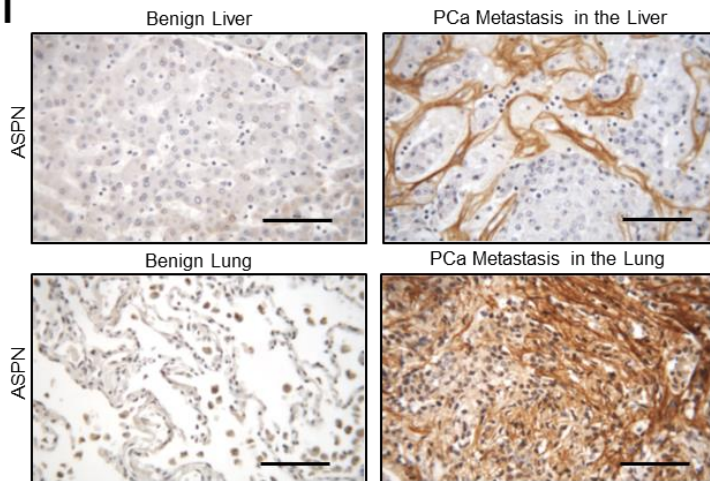

**Supplementary Figure S4.** ASPN expression in human cancer cell lines is correlated with MSC markers. A, ASPN expression in human cancer cell lines (n = 1062), grouped by cancer type. B, Correlation of ASPN expression with EPCAM expression, an epithelial-derived cell marker, in cancer cell lines. C-G, Correlation of ASPN expression with the expression of human MSC markers, including THY1 (C), ENG (D), VCAM (E), ALCAM (F), and CD44 (G) in cancer cell lines. Cancer cell line expression data obtained from the Broad Institute's Cancer Cell Line Encyclopedia [50]. Box plot in (A) courtesy of Plotly. Statistical analyses in B-G performed using Pearson correlation coefficient. H, Relative Aspnr expression in mouse models of prostate cancer including Hi-Myc (FVB), *Pten*<sup>-/-</sup> (C57/BL6J), and B6CaP (C57/BL6J) as measured by qRT-PCR of whole tissue. I, ASPN expression in benign tissue and metastatic prostate cancer as measured by IHC (black bar = 100 μM).



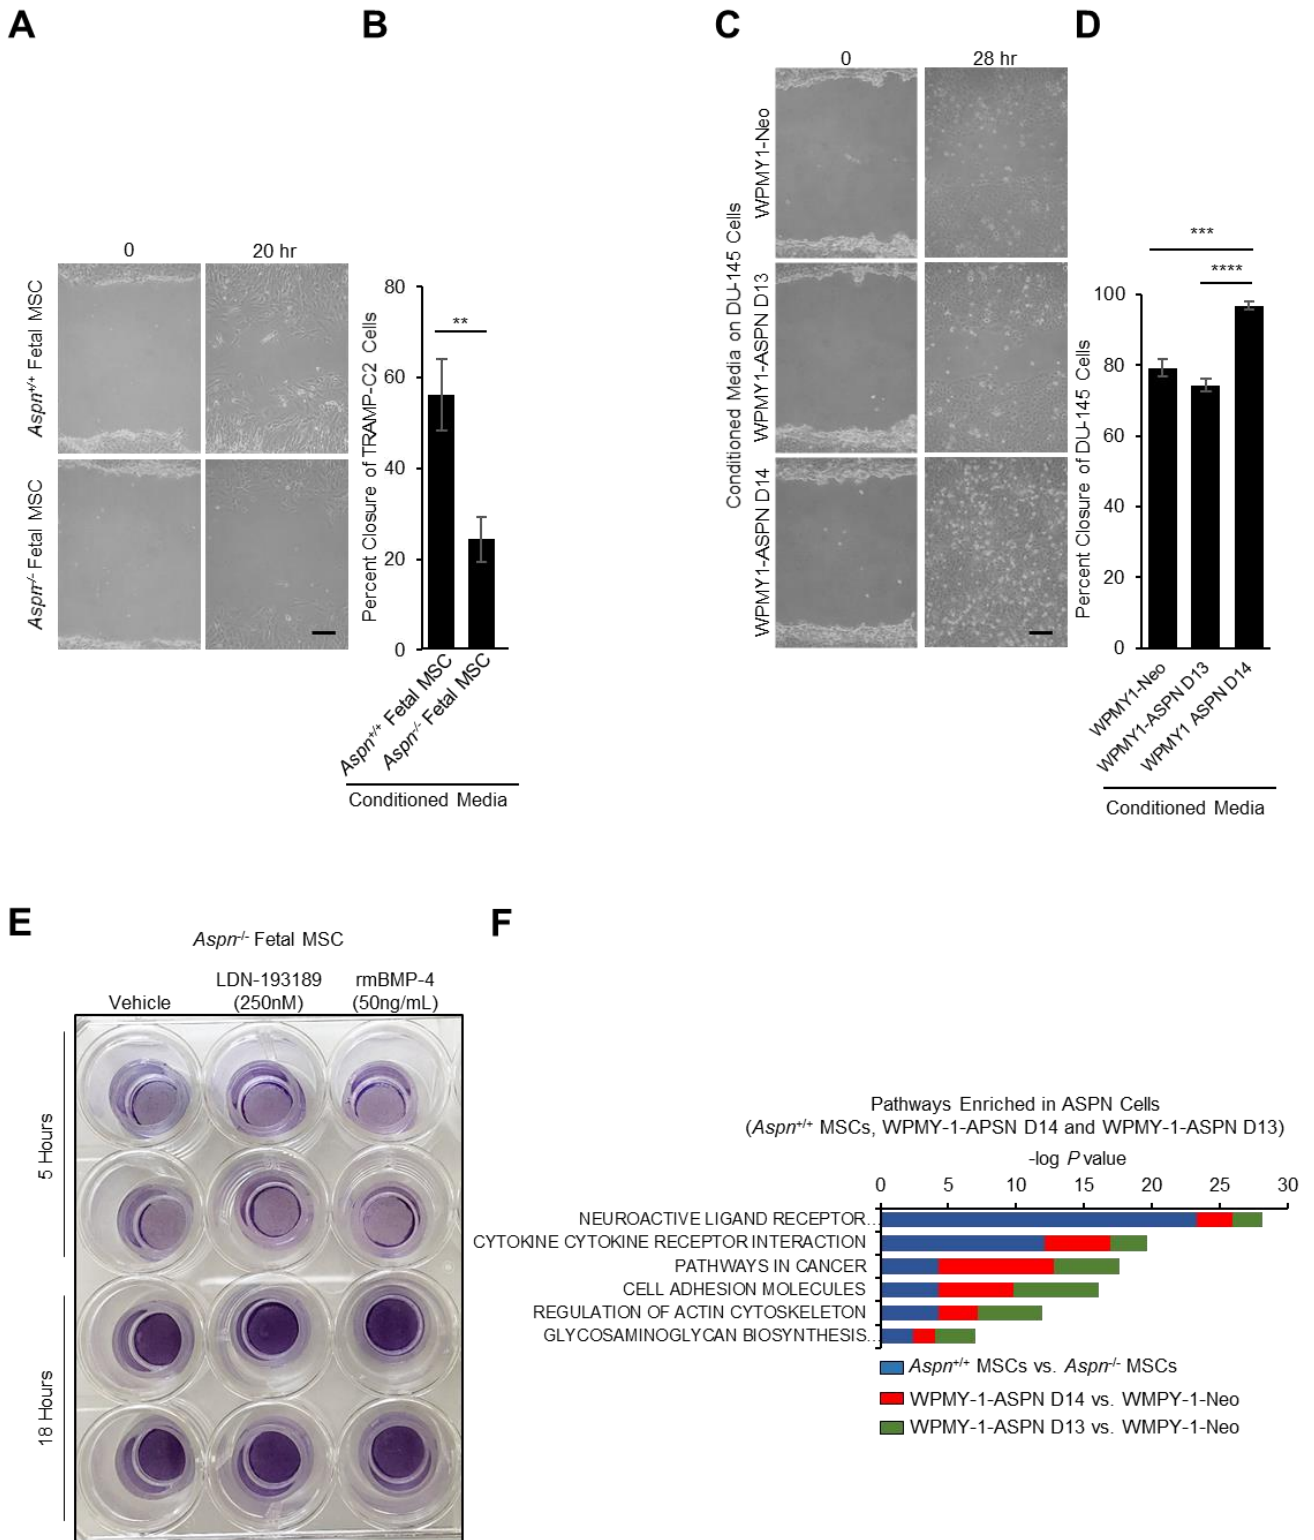

**Supplementary Figure S5.** ASPN increases cancer cell migration. A, B, Migration of TRAMP-C2 cells in conditioned media from *Asprn*<sup>+/+</sup> and *Asprn*<sup>-/-</sup> fetal MSCs as determined by scratch assay. Statistical analyses performed using Student's t-test (mean  $\pm$  SEM; \*\* $P \leq 0.01$ ;  $n=3$  independent MSCs). C, D, Migration of DU145 cells in conditioned media from WPMY1-Neo, WPMY1-ASP N D13, and WPMY1-ASP N D14. Statistical analyses performed using one-way ANOVA with Tukey multiple comparison (mean  $\pm$  SEM; \*\*\* $P \leq 0.001$ , \*\*\*\* $P \leq 0.0001$ ;  $n \geq 9$ ). E, Migration of *Asprn*<sup>-/-</sup> fetal MSCs treated with vehicle, recombinant mouse BMP-4 (50 ng/mL) or LDN-193189 (250 nM) as determined by transwell assay. F, KEGG pathway analysis in ASPN cells (*Asprn*<sup>+/+</sup> fetal MSCs, WPMY1-ASP N D14, WPMY1-ASP N D13) compared to ASPN deficient/low cells (*Asprn*<sup>-/-</sup> and WPMY1-Neo).

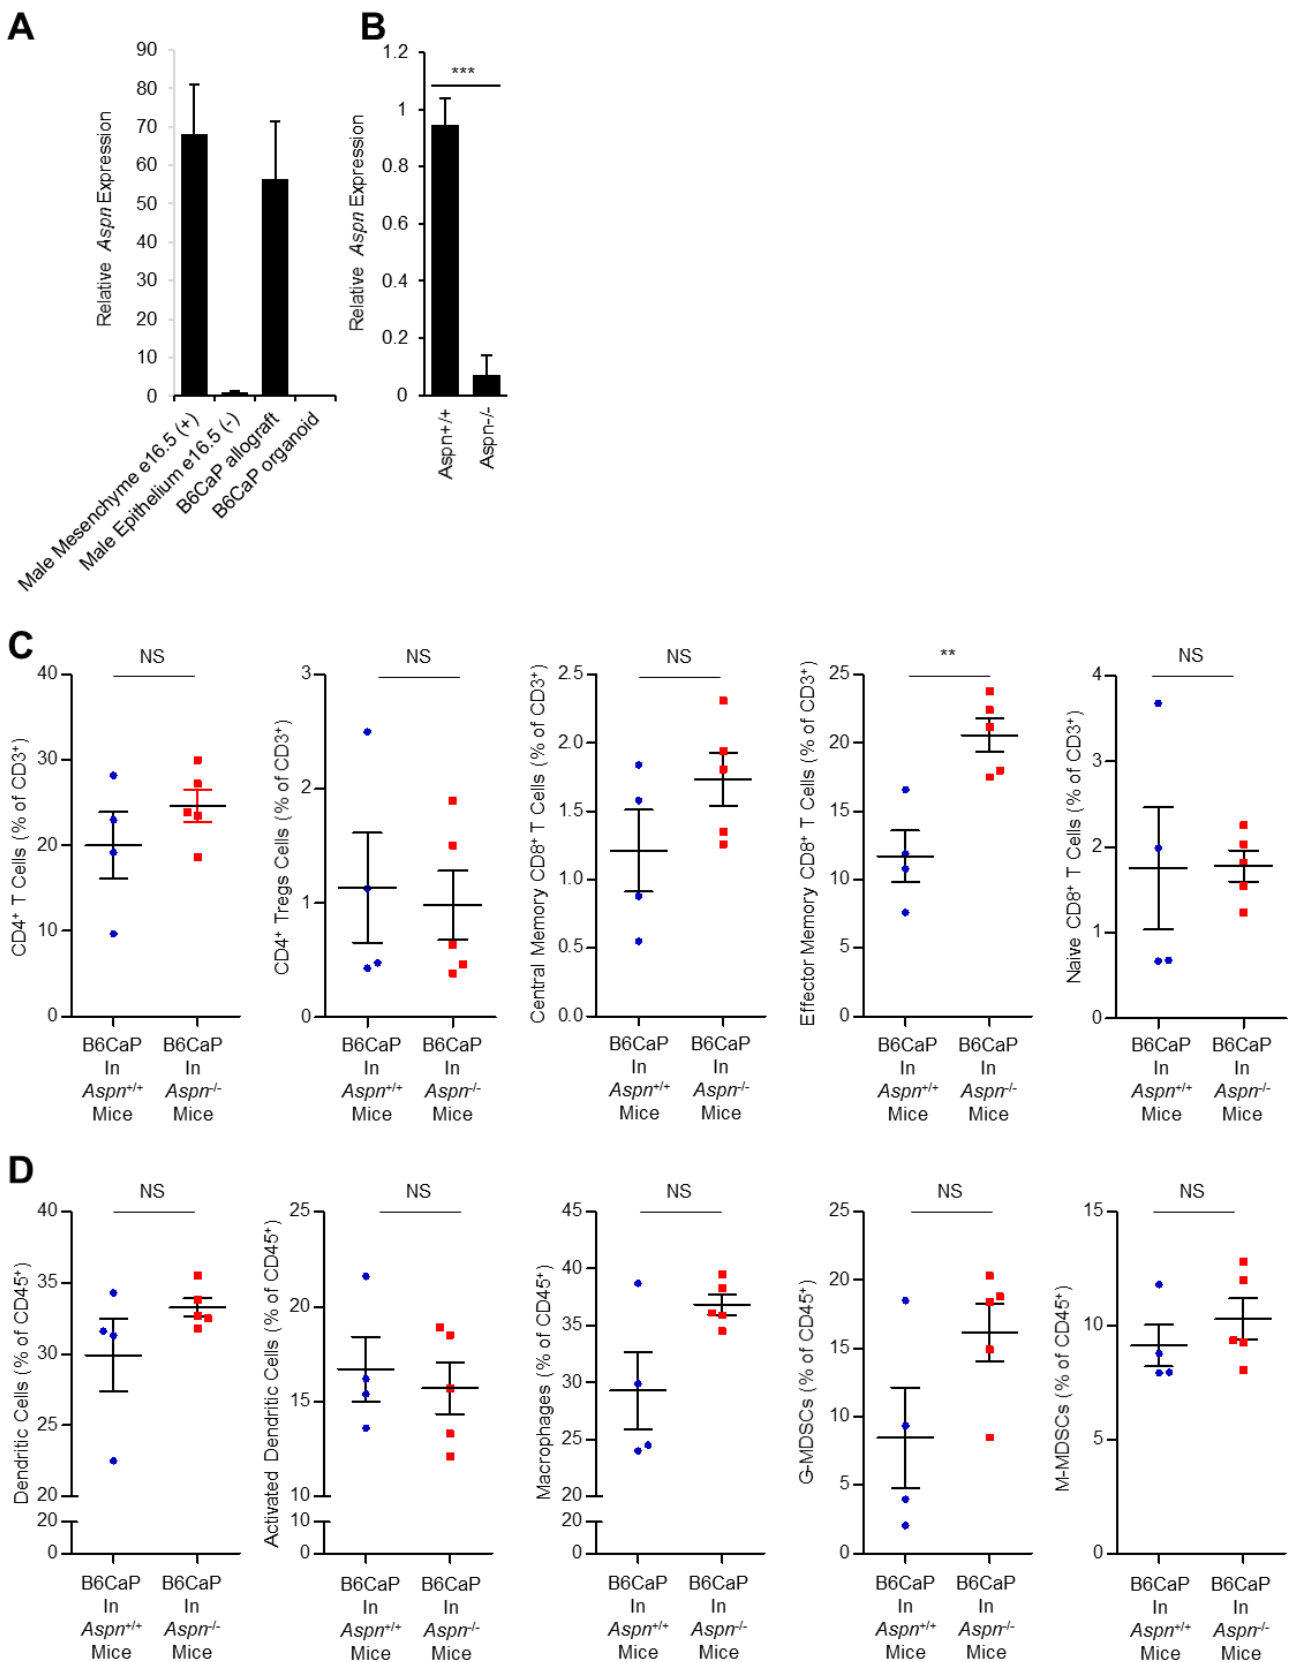

**Supplementary Figure S6.** *Aspn* expression in B6CaP allografts and organoids. A, Relative *Aspn* gene expression in B6CaP allograft and organoids as measured by qRT-PCR and compared to male fetal prostate mesenchyme and epithelia (n=3). B, Relative *Aspn* expression in B6CaP subcutaneous allografts at resection in *Aspn*<sup>+/+</sup> and *Aspn*<sup>-/-</sup> mice as determined by qRT-PCR. Statistical analyses performed using Student's t-test (mean ± SEM; \*\*\*P≤0.001; n≥3). C, Lymphoid cells in B6CaP subcutaneous allografts at resection in *Aspn*<sup>+/+</sup> and *Aspn*<sup>-/-</sup> mice. Tregs (CD4<sup>+</sup>Foxp3<sup>+</sup>), central memory CD8 (CD8<sup>+</sup>, CD44<sup>+</sup>, CD62L<sup>+</sup>), effector memory CD8 (CD8<sup>+</sup>, CD44<sup>+</sup>, CD62L<sup>-</sup>), naive CD8 (CD8<sup>+</sup>, CD44<sup>-</sup>, CD62L<sup>+</sup>). D, Myeloid cells in B6CaP subcutaneous allografts at resection in *Aspn*<sup>+/+</sup> and *Aspn*<sup>-/-</sup> mice. Dendritic Cells (CD11b<sup>+</sup>, CD11c<sup>+</sup>), activated dendritic cells (CD11b<sup>+</sup>, CD11c<sup>+</sup>, MHCII<sup>+</sup>), macrophages (CD11b<sup>+</sup>, F4/80<sup>+</sup>), G-MDSCs (CD11b<sup>+</sup>, Ly6G<sup>+</sup>), M-MDSCs (CD11b<sup>+</sup>, Ly6C<sup>+</sup>).
